# Supplementary material
Source: PubMed Central journal article supplement (PMC4168401)
Supplement: gf456sup_10-1055-s-0031-1298441.pdf [file gf456sup_10-1055-s-0031-1298441.pdf]

# Axilladisektion bei positivem Sentinel-Lymphknoten: Ergebnisse Innsbrucker Konsensuskonferenz

## Axillary Dissection in the Case of Positive Sentinel Lymph Nodes: Results of the Innsbruck Consensus Conference

### Autoren

M. Hubalek<sup>1</sup>, R. Bartsch<sup>3</sup>, M. Gnant<sup>2</sup>, K. S. Kapp<sup>4</sup>, A. Lang<sup>5</sup>, S. Lax<sup>6</sup>, P. Lukas<sup>7</sup>, W. Neunteufel<sup>8</sup>, G. Pristauz<sup>9</sup>, R. Reitsamer<sup>10</sup>, P. Sandbichler<sup>11</sup>, P. Schrenk<sup>12</sup>, C. Singer<sup>14</sup>, K. Tamussino<sup>9</sup>, J. Tschmelitsch<sup>13</sup>, A. G. Zeimet<sup>1</sup>, C. Marth<sup>1</sup>

### Institute

Die Institutsangaben sind am Ende des Beitrags gelistet

### Schlüsselwörter

- Sentinel-Lymphknoten
- Axilladisektion
- ACOSOG-Z0011
- Brustkrebs

### Key words

- sentinel lymph node
- axillary dissection
- ACOSOG-Z0011
- breast cancer

### Zusammenfassung

Die Prognose des Mammakarzinoms wird durch den axillären Lymphknotenstatus am stärksten beeinflusst. Dieses Wissen wurde noch bis vor wenigen Jahren durch die radikale axilläre Lymphonodektomie erlangt. Inzwischen ist die Sentinel-Lymphonodektomie etablierter Bestandteil in der operativen Behandlung des Mammakarzinoms geworden. Durch die Entwicklung dieses Verfahrens konnte die Morbidität, die durch eine axilläre Dissektion verursacht wird, wesentlich reduziert werden. Wengleich erst jetzt umfassende prospektiv randomisierte Daten zur sicheren Anwendung des Sentinel-Konzepts vorliegen, geht es aktuell jedoch bereits um die Frage, ob bei positivem Sentinel-Lymphknoten auf eine Axilladisektion (AD) gänzlich verzichtet werden kann, ohne das Risiko für ein lokoregionäres Rezidiv oder das progressionsfreie Überleben und Gesamtüberleben negativ zu beeinflussen. Die Ergebnisse der amerikanischen ACOSOG-Z0011-Studie haben die grundlegende Betrachtungsweise verändert. In dieser Studie zum Vorteil der Axilladisektion nach Tumornachweis im Sentinel-Lymphknoten ergaben sich für die Patientinnen mit günstigem Gesamtrisikoprofil und applizierter Strahlentherapie und systemischer Therapie keine statistisch signifikanten Vorteile durch die Axilladisektion. Setzt sich dieses Konzept durch, wäre die operative Versorgung des nodal-positiven Mammakarzinoms zumindest in der Axilla auf ein Minimum reduziert und der Fokus der Behandlung läge zukünftig mehr in der systemischen Behandlung dieser Erkrankung. Im Rahmen eines interdisziplinären Konsensus-Meetings wurde eine einheitliche Vorgehensweise für Österreich diese Fragestellung betreffend beschlossen.

### Abstract

The prognosis of breast cancer is most heavily influenced by the status of the axillary nodes. Until a few years ago, this knowledge was gained through radical axillary lymph node clearance. In the meantime, sentinel lymph node clearance has become an established part of the surgical treatment of breast cancer. With the development of this procedure, the morbidity caused by axillary dissection has been reduced significantly. Although comprehensive prospective, randomised data regarding the safe use of the sentinel concept are only now available, the focus currently, however, is on the question of whether in the case of positive sentinel lymph nodes, an axillary dissection can be done away with altogether without having any negative impact on the risk of loco-regional recurrence or on progression-free survival and overall survival. The results of the American ACOSOG-Z001 study have changed the fundamental perspective of this. In this study on the advantages of axillary dissection following the confirmation of tumour tissue in the sentinel lymph nodes, there were no statistically significant advantages from axillary dissection for women with a favourable overall risk profile who had received radiotherapy and systemic therapy. If this concept takes hold, the surgical treatment of node-positive breast cancer, at least in the axilla, would be reduced to a minimum, and the focus of treatment would in future lie more on the systemic treatment of this condition. As part of an interdisciplinary consensus meeting, a standardised approach for Austria with regard to this question was decided upon.

eingereicht 21.12.2011

akzeptiert 29.2.2012

### Bibliografie

**DOI** <http://dx.doi.org/10.1055/s-0031-1298441>  
Geburtsh Frauenheilk 2012; 72  
© Georg Thieme Verlag KG  
Stuttgart · New York ·  
ISSN 0016-5751

### Korrespondenzadresse

**Dr. Michael Hubalek, MD**  
Medizinische Universität  
Innsbruck, Brustgesundheits-  
zentrum Tirol, Universitäts-  
Frauenklinik Innsbruck  
Anichstraße 35  
6020 Innsbruck  
Österreich  
[michael.hubalek@i-med.ac.at](mailto:michael.hubalek@i-med.ac.at)

## Einleitung

Die operative Therapie des Mammakarzinoms hat sich von der routinemäßigen radikalen Mastektomie in Richtung weit weniger mutilierender Eingriffe entwickelt – insbesondere die Etablierung des brusterhaltenden Therapiekonzepts stellt einen entscheidenden Fortschritt dar. Während sich also das Vorgehen in Hinblick auf den Primärtumor innerhalb der letzten Dekaden deutlich verändert hat, war die axilläre Dissektion bis vor Kurzem die Standardtherapie sowohl der nodal-positiven als auch der nodal-negativen Mammakarzinompatientin. Durch die klinische Etablierung und Validierung des Konzepts des Sentinel-Lymphknotens in der operativen Therapie des Mammakarzinoms ist eine Axilladissektion bei Patientinnen mit negativen Wächterlymphknoten nicht mehr notwendig [1]. Damit konnte auch die mit einer Axilladissektion verbundene Morbidität erheblich gesenkt werden. Eine axilläre Lymphonodektomie ist allerdings bei Frauen mit metastatisch besiedelten Wächterlymphknoten nach wie vor ein Standardvorgehen. Nun schlägt ein aktuelles Studienergebnis [2] vor, dass möglicherweise bei einem Teil der Patientinnen auf diese gängige und leitlinienkonforme Vorgehensweise verzichtet werden kann.

Die Halsted-Theorie, die von einer lokalen Ausbreitung der Erkrankung ausgeht, wurde durch die bahnbrechenden Arbeiten des NSABP in neuerer Zeit eindrucksvoll infrage gestellt. In der B-04-Studie des National Surgical Adjuvant Breast and Bowel Project (NSABP) [3] wurden Frauen mit Mammakarzinom ursprünglich in 5 Behandlungsgruppen randomisiert. Patientinnen mit palpablen Lymphknoten wurden einer radikalen Mastektomie nach Halsted oder einer einfachen Mastektomie gefolgt von einer regionalen Strahlentherapie unterzogen. Patientinnen ohne klinisch pathologische bzw. palpable Lymphknoten wurden in 3 verschiedene Studienarme randomisiert: radikale Mastektomie nach Halsted (mit axillärer Dissektion), totale Mastektomie mit regionaler Strahlentherapie, oder Mastektomie ohne weitere lokale Behandlung gefolgt von einer Axilladissektion im Falle eines axillären Lymphknotenrezidivs. Bei den Patientinnen der radikal operierten (Halsted-)Gruppe zeigte sich in 40% der Fälle eine okkulte axilläre Lymphknotenmetastasierung. Trotz einer axillären Rezidivrate von 19% in der Gruppe der einfachen Mastektomie war das Überleben nach 25 Jahren in allen 3 Behandlungsarmen identisch.

Durch viele weitere Untersuchungen, die zeigten, dass die radikale Entfernung bzw. die Behandlung von axillären Lymphknoten keinen Überlebensvorteil erbringt, wurde das Konzept des Sentinel-Lymphknotens entwickelt und klinisch validiert. Diese Technik hat die axilläre Lymphonodektomie entsprechend Level I und II für das Staging der axillären Lymphknoten in der Behandlung des frühen Mammakarzinoms inzwischen abgelöst. In der kürzlich publizierten Studie von Veronesi et al. [4] konnte gezeigt werden, dass bei 516 Patientinnen nach einem 10-Jahres-Follow-up sowohl die Lokalrezidivrate als auch das DFS zwischen negativer SLN-Biopsie allein oder in Kombination mit einer Axilladissektion gleich war. Die Schwierigkeit des „Beweises“ eines tatsächlich fehlenden Unterschieds besteht in der extremen Seltenheit des axillären Rezidivs.

Retrospektive Studien legen nahe, dass auf die axilläre Dissektion bei positivem SLN unter bestimmten Voraussetzungen verzichtet werden kann. Aufgrund der retrospektiven Natur dieser Analysen sind diese Daten jedoch nur eingeschränkt für die Praxis verwertbar, da sie *en principe* keinen klinischen Standard definieren können. Überblicksartig zeigen diese Ergebnisse eine ins-

gesamt niedrige axilläre Lokalrezidivrate bei Patientinnen mit positiven SLN ohne axilläre Dissektion. Das Risiko für ein lokales Rezidiv war in diesen Berichten umso geringer, je älter die Patientinnen, je kleiner der Primärtumor, je differenzierter der Tumor und je kleiner die Metastase im Sentinellymphknoten war, eine brusterhaltende Therapie jedoch vorausgesetzt. In der retrospektiven Arbeit von Bilimoria et al. [5], die über 400 000 Patientinnen aus der SEER-Datenbank einschloss, wurde aus verschiedenen Gründen auf eine axilläre Dissektion trotz positiven SLN in 21% der Patientinnen verzichtet. Patientinnen mit axillärer Dissektion hatten weder einen Überlebensvorteil noch eine geringere Lokalrezidivrate als jene Patientinnen, bei denen keine axilläre Dissektion durchgeführt wurde. Dieses Ergebnis trifft sowohl auf Mikro- als auch auf Makrometastasen im SLN zu. Die niederländische MIRROR-Studie [6] jedoch zeigte klar den prognostisch ungünstigen Wert von disseminierten Tumorzellen bzw. Mikrometastasen im SLN, insbesondere bei Patientinnen, die keine entsprechende adjuvante systemische Therapie erhielten. Allerdings brachte die axilläre Dissektion bei diesen Patientinnen keine Verbesserung des Überlebens.

In einer weiteren Studie von Yi et al. [7] wurden 27 000 Patientinnen mit nodal-positiven Mammakarzinomen aus der SEER-Datenbank retrospektiv analysiert. In der Publikation beschreiben die Autoren, dass Patientinnen mit SLN und nachfolgender AD ein schlechteres krankheitsspezifisches Überleben aufweisen als Patientinnen, die nur eine SLN-Biopsie erhielten. Als mögliche Erklärung für dieses überraschende Ergebnis wurde spekuliert, dass Frauen, an denen beide Eingriffe vorgenommen wurden, bereits unter einer fortgeschritteneren Krankheit litten. Diese Annahme wurde vom Umstand unterstützt, dass die Tumoren in der Gruppe mit AD häufiger größer und hormonrezeptornegativ waren. Im Gegensatz dazu zeigte sich bei Patientinnen mit Mikrometastasen (0,2–2 mm) kein Unterschied im krankheitsspezifischen Überleben zwischen den beiden Gruppen (SLN alleine vs. SLN gefolgt von AD). Die Autoren folgerten aus diesen Ergebnissen, dass die Vorteile der Vermeidung einer Axilladissektion gegen die Risiken einer okkulten axillären Lymphknotenmetastasierung abgewogen werden müssen.

Bezüglich der Mikrometastasen im SLN ist die Datenlage jedoch inzwischen recht eindeutig: Durch die Metaanalyse der Early Breast Cancer Trialists' Collaborative Group von insgesamt 78 randomisierten Studien (42 000 Patientinnen) aus der „Prä-SLN“-Ära wird angenommen, dass Unterschiede in der lokalen Kontrolle von 10–20% nach 5 Jahren Follow-up sich in einen statistisch signifikanten Unterschied (5% absolute Risikoreduktion) im Überleben nach 15 Jahren manifestieren [8]. Um diesen Unterschied in der Lokalrezidivrate durch den Wegfall der Axilladissektion zu erreichen, müsste der weitere nodale Befall bei einer Mikrometastasierung im SLN die 30-Prozent-Marke überschreiten, was nicht der derzeitigen Datenlage entspricht.

Aufgrund des aktuellen Wissenstands kann davon ausgegangen werden, dass Patientinnen mit Mikrometastasen im SLN geringen bzw. keinen Benefit – abgesehen von der prognostischen Information – von einer axillären Dissektion erlangen. Diese indirekten und retrospektiven Ergebnisse können aber letztlich nicht ausreichen, einen klinischen Standard zu ändern, obwohl dies z. B. bei der Implementierung des SLN sehr frühzeitig letztlich ohne ausreichende klinische Studien erfolgte.

Von der amerikanischen Studiengruppe ACOSOG wurde kürzlich die Z0011-Studie vorgelegt, die den Stellenwert der axillären Lymphonodektomie (ALND) bei Sentinel-positiven Mammakarzinomen untersuchte [2]. Einschlusskriterien waren: Tumor-

größe kleiner als 5 cm, max. 2 positive SLN (Mikro- oder Makrometastase in der HE-Färbung); Ausschlusskriterien waren u.a. partielle Brustbestrahlung, intentionelle axilläre Bestrahlung, nur immunhistochemisch nachgewiesene SN-Metastasen, LK-Kapseldurchbruch beim SLN, sowie Patientinnen mit Mastektomie. 856 Patientinnen konnten in die „Intention-to-treat-Analyse“ eingebracht werden. In 106 Fällen (27,4%) mit positivem SN wurden in der ALND weitere positive Lymphknoten nachgewiesen. Nach einer Nachbeobachtungszeit von im Median 6,3 Jahren hatte die ALND keinen Einfluss auf krankheitsfreies Überleben, Gesamtüberleben und lokoregionäre Rezidivrate.

Noch ist unklar, inwieweit diese Ergebnisse durch die adjuvante Strahlentherapie beeinflusst wurden. In der Z0011-Studie haben fast alle Patientinnen nach einer brusterhaltenden Operation, wie vorgesehen, eine Bestrahlung der operierten Brust erhalten. Da keine Qualitätssicherung der Strahlentherapie durchgeführt wurde, ist unklar, ob und in welchem Ausmaß axilläre Lymphknotenstationen mitbestrahlt wurden. Es wird daher diskutiert, ob die geringe Rate an axillären Rezidiven auf eine nicht geplante Bestrahlung der Axilla zurückzuführen ist. Als Schwäche dieser prospektiven Studie muss auch gesehen werden, dass die Studie wegen langsamer Rekrutierung nach 891 Patientinnen vor Erreichen der geplanten 1900 Patientinnen geschlossen wurde und von der relativ großen Anzahl teilnehmender Zentren jeweils nur sehr kleine Patientinnenzahlen rekrutiert wurden. Anzumerken ist weiters, dass über 30% der eingebrachten Patientinnen lediglich Mikrometastasen im Sentinellymphknoten aufwiesen, sodass eine Selektion von Patientinnen mit biologisch niedrigerem Risiko nicht ausgeschlossen werden kann.

Die Schlussfolgerung der AutorInnen aus dieser Studie war, dass bei positivem Wächterlymphknoten eine routinemäßig durchgeführte axilläre Lymphknotenentfernung bei Patientinnen mit klinisch negativer Axilla nicht immer gerechtfertigt ist. Diese Konklusion hat national und international für großes Aufsehen gesorgt und letztlich auch zu Verunsicherung in der Behandlung von Mammakarzinompatientinnen geführt.

### Fragestellung

Es war der Österreichischen Gesellschaft für Gynäkologie und Geburtshilfe sowie der Arbeitsgemeinschaft für Gynäkologische Onkologie daher ein großes Anliegen, zumindest national einen Standard zu definieren, der für die operativ tätigen ÄrztInnen zu einer höheren Behandlungssicherheit führen kann. Aus diesem Grund wurde eine Konsensuskonferenz unter internationaler Beteiligung organisiert.

### Methodik

Die Österreichische Gesellschaft für Gynäkologie und Geburtshilfe (ÖGGG) und die Arbeitsgemeinschaft für Gynäkologische Onkologie (AGO) haben anerkannte Spezialisten auf dem Gebiet der Diagnostik und Therapie des Mammakarzinoms eingeladen, an dieser Konsensuskonferenz teilzunehmen. Die 15 Mitglieder des Panels waren (in alphabetischer Reihenfolge): Bartsch Rupert (internistische Onkologie), Gnant Michael (Chirurgie), Hubalek Michael (Gynäkologie), Kapp Karin (Radioonkologie), Lang Alois (internistische Onkologie), Lax Sigurd (Pathologie), Marth Christian (Gynäkologie), Lukas Peter (Radioonkologie), Neunteufel Walter (Gynäkologie), Reitsamer Roland (Gynäkologie), Sand-

bichler Peter (Chirurgie), Schrenk Peter (Chirurgie), Tamussino Karl (Gynäkologie), Tschmelitsch Jörg (Chirurgie), Zeimet Alain (Gynäkologie). Somit bestand das interdisziplinäre Panel zu 33% aus Gynäkologen, 27% aus Chirurgen, 15% aus internistischen Onkologen, 15% aus Radioonkologen und 10% aus Pathologen. Keiner der Panelists bekundet einen Interessenkonflikt im Rahmen der Abstimmung.

Das Publikum (123 Teilnehmer) der Konferenz waren zu 25% Chirurgen, 57% Gynäkologen, 5% internistische Onkologen, 5% Pathologen und 8% Radioonkologen. Im Vorfeld wurden Fragen ausgearbeitet, welche die Grundlage der Konferenz sein sollten. Die eigentliche Konferenz war zweigeteilt – zuerst wurden die retrospektiv und prospektiv erhobenen Daten präsentiert, wobei hierzu auch 2 Prüfarzte der ACOSOG-Z0011-Studie geladen waren (Elizabeth A. Mittendorf M.D., Assistant Professor, Department of Surgical Oncology, Division of Surgery, The University of Texas MD Anderson Cancer Center, Houston, TX; Eric A. Strom M.D., F.A.C.R., Professor, Department of Radiation Oncology, Division of Radiation Oncology, The University of Texas MD Anderson Cancer Center, Houston, TX). Im Anschluss hatten das Panel und das Publikum die Gelegenheit, die Ergebnisse auf Grundlage der Fragen nochmals zu diskutieren. Über die Fragen wurde durch ein Voting-System im Panel und im Publikum getrennt abgestimmt, und die Ergebnisse wurden ebenfalls für die beiden Gruppen getrennt bekanntgegeben.

### Ergebnisse (Tab. 1)

#### Frage 1: Reichen die Ergebnisse der ACOSOG-Z0011-Studie aus, um unsere klinische Praxis zu ändern?

Die Diskussion der Konsensuskonferenz wurde nach Vorstellung der Studien und der retrospektiven Literatur mit der Erörterung der prinzipiellen Frage eröffnet, ob Ergebnisse einer einzigen Studie ausreichen können, um die klinische Praxis zu ändern. Es herrschte letztlich in der Diskussion ein klares Votum dafür, dass in Ausnahmefällen auch eine einzige Studie, wenn sie gut geplant und durchgeführt worden ist, ausreichen kann, Routinemaßnahmen abzuändern. Dies trifft vor allem in erkenntnistheoretischen Grenzbereichen zu, sofern die Studie einen exzellenten Qualitätsstandard aufweist. Allerdings müssen für die ACOSOG-Z0011-Studie diesbezüglich doch einige Einschränkungen ausgesprochen werden. Letztlich war es dann nicht erstaunlich, dass das Panel zwischen „ja“ mit 38% und „vielleicht“ 38% in der Waage war, 25% haben mit „nein“ abgestimmt. Im Publikum hingegen war eine klare Mehrheit für „vielleicht“, was wohl gleichzustellen ist mit einer eingeschränkten Anwendung der Ergebnisse.

#### Frage 2: Ist eine Axilladisektion bei immunhistochemischem Nachweis von isolierten Tumorzellen im SLN notwendig?

Diese Frage wurde aufgrund der derzeit gültigen Leitlinien und der rezenten Datenlage nur kurz diskutiert. Es wurde ja auch bisher bereits der alleinige Nachweis von isolierten Tumorzellen als nodal-negativ und *i+* klassifiziert. Es war daher nicht erstaunlich, dass die überwiegende Mehrzahl des Panels als auch des Publikums (94 bzw. 93%) mit Nein votierte.

### Frage 3: Soll der immunhistochemische Nachweis von Tumorzellen im Sentinel nach wie vor durchgeführt werden?

Da der alleinige immunhistochemische Nachweis von Tumorzellen für die klinische Therapieentscheidung keine wesentliche Bedeutung hat, war die Diskussion durch methodische bzw. diagnostische Aspekte geprägt. Vor allem die Pathologen haben die Meinung vertreten, dass die Immunhistochemie weiterhin für die korrekte Diagnose Mikrometastasen und kleine Makrometastasen im Sentinellymphknoten hilfreich sein kann. Insbesondere bei lobulären Karzinomen kann das Erkennen von Metastasen bzw. die Bestimmung der exakten Metastasengröße schwierig und der Einsatz der Zytokeratin-Immunhistochemie wesentlich sein [9]. Für die Entscheidungsfindung, ob eine axilläre Lymphknotendissektion durchgeführt werden sollte oder nicht, spielt das Ergebnis eines immunhistochemischen Nachweises von Tumorzellen keine Rolle. Diese Meinung spiegelt sich im Ergebnis der Abstimmung wider.

### Frage 4: Ist eine Axilladissektion bei Mikrometastasen im Sentinellymphknoten notwendig?

Bisher wurde in Österreich bei einem derartigen Befund routinemäßig eine Axilladissektion indiziert. Aufgrund der vorliegenden retrospektiven Daten, den Empfehlungen des St.-Gallen-Konsensus-Meeting 2011 und letztendlich der ACOSOG-Z0011-Studie wurde in der Diskussion doch mehrheitlich die Meinung vertreten, dass der Nutzen einer Axilladissektion sehr fraglich sei. Insbesondere ist nicht zu erwarten, dass eine wesentliche Abänderung der adjuvanten Therapie vorgenommen werden würde, da die Wahrscheinlichkeit relevanter auch Makrometastasen in weiteren Non-Sentinel-Lymphknoten sehr gering sei. Allerdings muss angemerkt werden, dass eine arbiträre Grenze von 2 mm natürlich nicht auf einer echten biologischen Grundlage fußt und daher auch prognostische Faktoren, wie z.B. hochmaligner Phänotyp, zu beachten sei. Letztlich haben dann unisono die Panelisten und das Publikum mit 80% gegen eine weitere Axilladissektion bei Mikrometastasen im Sentinel votiert.

### Frage 5: Ist eine Axilladissektion bei Makrometastasen im Sentinel-Lymphknoten notwendig?

In der Diskussion wurde doch deutlich Kritik an der ACOSOG-Z0011-Studie geäußert, die eine direkte Implementierung der Ergebnisse für den Routinealltag verhindert. Insbesondere wurde auf die Wichtigkeit deutlicher Restriktionen hingewiesen und ein genereller Verzicht der Axilladissektion als nicht möglich erachtet. Aus diesem Grund war das Abstimmungsergebnis mit 80% Ja-Stimmen im Panel und 82% Ja-Stimmen im Publikum nicht erstaunlich. Aufgrund des Ergebnisses wurde allerdings die Frage auch noch weiter diskutierend ausgeführt, ob die Erkenntnisse nur für eine Subgruppe von Patientinnen angewendet werden soll.

### Frage 6: Soll bei Patientinnen mit guten Prognosefaktoren (postmenopausal, hormonrezeptorpositiv, histologisches Grading I + II, niedriges Ki67) bei Makrometastase in einem Sentinel-Lymphknoten weiterhin die Axilladissektion durchgeführt werden?

In besonderer Weise wurde darauf hingewiesen, dass bedeutsamer als die Größe der Metastase v.a. die biologischen Eigenschaften des Tumors sein dürften, und dass bei der in der Frage beschriebenen Patientinnengruppe aufgrund der niedrigen Rezidivwahrscheinlichkeit und insbesondere niedrigen Wahr-

rscheinlichkeit, weitere positive Lymphknoten zu finden, auf die Axilladissektion verzichtet werden könnte. 79% des Panels und 71% des Publikums waren der Meinung, dass bei dieser Niedrigrisikogruppe eine Axilladissektion wohl nicht zwingend durchgeführt werden muss. Diese Subgruppe entspricht im Wesentlichen auch der Population, die letztlich vorrangig (und wohl selektiv) in die ACOSOG-Z0011-Studie rekrutiert wurde. Wenn die Inklusionskriterien auch formal weiter gefasst waren, so war die zur Studie eingebrachte Patientinnengruppe deutlich eingeschränkt. Gute Prognosefaktoren wurden folgendermaßen definiert: histologischer Grad I und II, mäßig bis hoch positiver Östrogen- und/oder Progesteronrezeptor, HER2-negativ, Ki67 <20%, Tumorgöße <5 cm (entsprechend pT1 und pT2), kein Gefäßeinbruch.

### Frage 7: Soll bei Patientinnen mit schlechten Prognosefaktoren (prämenopausal, hormonrezeptornegativ, HER-2-positiv, Malignitätsgrad III, hohes Ki67) bei Makrometastase in einem Sentinel-Lymphknoten weiterhin die Axilladissektion durchgeführt werden?

Diese Frage hat sich konkludent aus den vorangegangenen ergeben. Hier war 100%ige Zustimmung der Panelists als auch des Publikums, die Axilladissektion weiterhin immer anzustreben. Schlechte Prognosefaktoren wurden folgendermaßen definiert: histologischer Grad III, schwacher bis negativer Östrogen- und Progesteronrezeptor, HER2-negativ/positiv, Ki67 >20%, Tumorgöße >5 cm (entsprechend pT3 und pT4), Gefäßeinbruch.

### Frage 8: Wie soll bei Patientinnen mit Mastektomie vorgegangen werden? Können die Kriterien wie bei brusterhaltender Operation angewandt werden?

In die ACOSOG-Z0011-Studie wurden ja ausschließlich Patientinnen mit brusterhaltender Operation und dadurch auch konsekutiver Nachbestrahlung inkludiert. Da keine Erkenntnisse zur Mastektomie gezogen werden können, war in der Diskussion relativ eindeutig, dass die Studienergebnisse nicht auf Patientinnen mit Mastektomie und fehlender Strahlentherapie zu übertragen seien. 72% des Panels und 64% des Publikums sehen weiterhin die Indikation zur Durchführung einer Axilladissektion bei positiven Sentinellymphknoten im Falle einer Mastektomie.

### Frage 9: Soll in Zukunft eine intraoperative Schnellschnittuntersuchung des SLN erfolgen?

Aufgrund der neuen Erkenntnisse stellt sich in weiterer Konsequenz die Frage, ob eine intraoperative Schnellschnittuntersuchung des Sentinel-Lymphknotens sinnvoll ist. Allerdings besteht doch die Möglichkeit, bei jenen Patientinnen, die keinesfalls die Kriterien für einen Axillaverzicht aufweisen, durch die Schnellschnittuntersuchung das operative Vorgehen in einem Eingriff zu komplettieren. Wohl aus diesem Grund haben letztlich 73% der Panelisten und 74% des Publikums für eine standardmäßige Durchführung einer intraoperativen Schnellschnittuntersuchung votiert.

### Frage 10: Wie sollen die axillären Lymphknoten präoperativ beurteilt werden?

Da die Durchführung der Sentinel-Lymphknotenbestimmung und letztlich auch der Axilladissektion von der präoperativen Beurteilung der Lymphknoten abhängig ist, wurde diese Frage auch eingehend diskutiert. Für neue bildgebende Verfahren, wie MRI oder PET in der Axilla, wird vorerst in der klinischen Routine kein Platz gesehen. Die Mehrzahl der Teilnehmer, sowohl am Podium



**Tab. 1** Ergebnisse der Abstimmung von Panel und Publikum der Innsbrucker Konsensuskonferenz: Die Abstimmungen von Panel und Publikum erfolgten getrennt und unabhängig voneinander.

|                                                                                                                                           |                    | Panel (%) | Publikum (%) |
|-------------------------------------------------------------------------------------------------------------------------------------------|--------------------|-----------|--------------|
| Reichen die Ergebnisse der ACOSOG-Z0011-Studie aus, um unsere klinische Praxis zu ändern?                                                 | ja                 | 38        | 16           |
|                                                                                                                                           | nein               | 25        | 31           |
|                                                                                                                                           | vielleicht         | 38        | 53           |
| Ist eine Axilladisektion bei immunhistochemischem Nachweis von isolierten Tumorzellen im SLN notwendig?                                   | ja                 | 6         | 7            |
|                                                                                                                                           | nein               | 94        | 93           |
| Soll der immunhistochemische Nachweis von Tumorzellen im SLN nach wie vor durchgeführt werden?                                            | ja                 | 44        | 78           |
|                                                                                                                                           | nein               | 56        | 22           |
| Ist eine Axilladisektion bei Mikrometastasen im SLN notwendig?                                                                            | ja                 | 20        | 20           |
|                                                                                                                                           | nein               | 80        | 80           |
| Wie sollen die axillären Lymphknoten präoperativ beurteilt werden?                                                                        | klinisch           | 20        | 7            |
|                                                                                                                                           | KI + US            | 73        | 75           |
|                                                                                                                                           | KI + US + MRI, PET | 7         | 18           |
| Ist eine Axilladisektion bei Makrometastasen im SLN notwendig?                                                                            | ja                 | 80        | 82           |
|                                                                                                                                           | nein               | 20        | 18           |
| Reichen <b>eine</b> prospektive Studie und die vorhandenen retrospektiven Daten aus, um die klinischen Standards zu ändern?               | ja                 | 38        | 37           |
|                                                                                                                                           | nein               | 63        | 63           |
| Sollen die Erkenntnisse nur an einer Subgruppe von Patientinnen angewendet werden (z. B. postmenopausal, ÖR+, MG I + II, niedriges Ki67)? | ja                 | 79        | 71           |
|                                                                                                                                           | nein               | 21        | 29           |
| Sollen aufgrund der Erkenntnisse Patientinnen aus Hochrisiko-Subgruppe exkludiert (z. B. prämenopausal, ÖR-, HER2+, MG III, hohes Ki67)?  | ja                 | 100       | 95           |
|                                                                                                                                           | nein               | 0         | 5            |
| Wie soll bei Patientinnen mit Mastektomie vorgegangen werden? Gleiches Vorgehen wie bei BET?                                              | ja                 | 28        | 36           |
|                                                                                                                                           | nein               | 72        | 64           |
| Soll in Zukunft eine intraoperative Schnellschnittuntersuchung des SLN erfolgen?                                                          | ja                 | 73        | 74           |
|                                                                                                                                           | nein               | 27        | 26           |

KI = klinische Palpation; US = Ultraschall der Axilla; MRT = Magnetresonanztomografie; PET = Positronenemissionstomografie; ÖR+ = Östrogenrezeptor positiv; ÖR- = Östrogenrezeptor negativ; MG = Malignitätsgrad

wie auch im Publikum, war der Meinung, dass eine klinische und sonografische Beurteilung der Lymphknoten erfolgen sollte. Eine alleinige klinische Tastuntersuchung wurde nur von der Minderheit der Teilnehmer unterstützt.

Einer der Kritikpunkte an der ACOSOG-Z0011-Studie war die fehlende Qualitätssicherung der Radiotherapie, die offen lässt, ob Teile der Axilla mitbestrahlt wurden. Ein fehlender Unterschied im Rezidiv und Gesamtüberleben wurde von manchen Kritikern an der Studie durch diese Art der Strahlentherapie geäußert. Es stellte sich daher die Frage, ob die Axilla nunmehr elektiv bestrahlt werden sollte. Im Rahmen der Diskussion wurde jedoch klar die Meinung vertreten, dass keinesfalls eine eingeschränkte Operation durch eine ausgedehntere Strahlentherapie ersetzt werden sollte. Das Argument, dass die axilläre Dissektion mit einer höheren Spättoxizität einhergeht als eine selektive Bestrahlung der Axilla, ist insofern nicht haltbar, da es bis dato keine Vergleichsdaten gibt. Aus diesem Grund wurde in der Diskussion eine Änderung der Strahlentherapie Richtlinien von den teilnehmenden Radioonkologen abgelehnt.

**Tab. 2** Empfehlungen der Innsbrucker Konsensuskonferenz: Die Angaben beziehen sich ausschließlich auf Patientinnen mit brusterhaltender Therapie. Prognostisch günstige Tumoren sind nach den folgenden Kriterien definiert: histologischer Grad I und II, mäßig bis hoch positiver Östrogen- und/oder Progesteronrezeptor, HER2-negativ, Ki67 < 20%, Tumorgroße < 5 cm (entsprechend pT1 und pT2), kein Gefäßseinbruch.

|                                            |                                                                           |
|--------------------------------------------|---------------------------------------------------------------------------|
| disseminierte Tumorzellen (Nanometastasen) | keine Axilladisektion                                                     |
| Mikrometastasen (< 2 mm)                   | keine Axilladisektion                                                     |
| Makrometastasen (> 2 mm)                   | Durchführung der Axilladisektion außer bei prognostisch günstigen Tumoren |

## Zusammenfassung

Die Innsbrucker Konsensuskonferenz gibt klare Empfehlungen für die weitere Durchführung der Axilladisektion (AD) bei positiven Sentinel-Lymphknoten (SLN) (● **Tab. 2**). Bei isolierten Tumorzellen und bei Mikrometastasen kann in Zukunft auf die Axilladisektion generell verzichtet werden. Möglicherweise wird im Einzelfall bei außerordentlich ungünstigem molekularen und klinisch-pathologischen Tumortyp weiterhin die Axilla indiziert sein. Bezüglich Makrometastasen war die Meinung, dass generell nicht auf die Axilladisektion verzichtet werden sollte, aber bei Makrometastase in einem Sentinellymphknoten (s. Frage 6) und dem Vorliegen besonders günstiger Prognosefaktoren wie positiver Hormonrezeptorstatus, HER2-Negativität, G1- und G2-Tumoren in postmenopausalen Patientinnen, der Verzicht erwogen werden kann. Dies entspricht zum Teil jenen PatientInnen, die in die ACOSOG-Z0011-Studie eingeschlossen wurden. Es wurde in der Diskussion angeregt, ein Register zur prospektiven Sammlung von Axilladaten in Österreich zu initiieren. Auf diese Weise wäre auch eine nationale Auswertung von Langzeitergebnissen möglich, welche die bisweilen vorliegenden Erkenntnisse bestätigen, aber auch widerlegen könnten.

## Interessenkonflikt

Nein.

## Institute

- <sup>1</sup> Brustgesundheitszentrum Tirol, Univ. Frauenklinik Innsbruck, Medizinische Universität Innsbruck, Innsbruck, Österreich
- <sup>2</sup> Univ.-Klinik für Chirurgie, Brustgesundheitszentrum MUW/AKH, Comprehensive Cancer Center, Medizinische Universität Wien, Wien, Österreich
- <sup>3</sup> Univ.-Klinik für Innere Medizin I, Brustgesundheitszentrum MUW/AKH, Comprehensive Cancer Center, Medizinische Universität Wien, Wien, Österreich
- <sup>4</sup> Univ.-Klinik für Strahlentherapie-Radioonkologie, Medizinische Universität Graz, Graz, Österreich
- <sup>5</sup> Abt. für Innere Medizin, Hämatologie und internistische Onkologie, Landeskrankenhaus Feldkirch, Feldkirch, Österreich
- <sup>6</sup> Institut für Pathologie, Landeskrankenhaus Graz West, Graz, Österreich
- <sup>7</sup> Univ.-Klinik für Strahlentherapie-Radioonkologie, Medizinische Universität Innsbruck, Innsbruck, Österreich
- <sup>8</sup> Abt. für Frauenheilkunde und Geburtshilfe, Krankenhaus Dornbirn, Dornbirn, Österreich
- <sup>9</sup> Klin. Abt. für Gynäkologie, Univ.-Klinik für Frauenheilkunde und Geburtshilfe, Medizinische Universität Graz, Graz, Österreich
- <sup>10</sup> Landesfrauenklinik, Univ.-Klinik für Spezielle Gynäkologie, St. Johannis-Spital Salzburg, Salzburg, Österreich
- <sup>11</sup> Chirurgische Abteilung, Krankenhaus St. Vinzenz in Zams, Zams, Österreich
- <sup>12</sup> Abt. Chirurgie II, Brust-Kompetenz-Zentrum, Krankenhaus der Stadt Linz, Linz, Österreich
- <sup>13</sup> Krankenhaus der Barmherzigen Brüder, St. Veit/Glan, Österreich
- <sup>14</sup> Klinische Abteilung für Allgemeine Gynäkologie und Gynäkologische Onkologie, Medizinische Universität Wien, Wien, Österreich

## Literatur

- 1 *Mansel RE, Fallowfield L, Kissin M et al.* Randomized multicenter trial of sentinel node biopsy versus standard axillary treatment in operable breast cancer: the ALMANAC trial. *JNCI* 2006; 98: 599–609
- 2 *Giuliano AE, Hunt KK, Ballman KV et al.* Axillary dissection vs. no axillary dissection in women with invasive breast cancer and sentinel node metastasis: a randomized clinical trial. *JAMA* 2011; 305: 569–575
- 3 *Fisher B, Jeong JH, Anderson S et al.* Twenty-five year follow-up of a randomized trial comparing radical mastectomy, total mastectomy, and total mastectomy followed by irradiation. *N Engl J Med* 2002; 347: 567–575
- 4 *Veronesi U, Viale G, Paganelli G et al.* Sentinel lymph node biopsy in breast cancer: ten-year results of a randomized controlled study. *Ann Surg* 2010; 251: 595–600
- 5 *Bilimoria KY, Bentrem DJ, Hansen NM et al.* Comparison of sentinel lymph node biopsy alone and completion axillary lymph node dissection for node-positive breast cancer. *J Clin Oncol* 2009; 27: 2946–2953
- 6 *de Boer M, van Deurzen CH, van Dijk JA et al.* Micrometastases or isolated tumor cells and the outcome of breast cancer. *N Engl J Med* 2009; 361: 653–663
- 7 *Yi M, Giordano SH, Meric-Bernstam F et al.* Trends in and outcomes from sentinel lymph node biopsy (SLNB) alone vs. SLNB with axillary lymph node dissection for node-positive breast cancer patients: experience from the SEER database. *Ann Surg Oncol* 2010; 17 (Suppl. 3): 343–351
- 8 *Clarke M, Collins R, Darby S et al.* Effects of radiotherapy and of differences in the extent of surgery for early breast cancer on local recurrence and 15-year survival: an overview of the randomized trials. *Lancet* 2005; 366: 2087–2106
- 9 *Cserni G, Bianchi S, Vezzosi V et al.* The value of cytokeratin immunohistochemistry in the evaluation of axillary sentinel lymph nodes in patients with lobular breast carcinoma. *J Clin Pathol* 2006; 59: 518–522
